# Supplementary material for: Prognostic value of serum cytokeratin 19 fragments (Cyfra 21-1) in patients with non-small cell lung cancer
Source: PubMed Central journal article supplement (PMC5386115; doi:10.1038/srep09444), 2015-04-22
Supplement: srep09444-s1.pdf [file srep09444-s1.pdf]

# **Prognostic value of serum cytokeratin 19 fragments (Cyfra 21-1) in patients with non-small cell lung cancer**

Youtao Xu<sup>1,2#</sup>, Lei Xu<sup>3#</sup>, Mantang Qiu<sup>1,4#</sup>, Jie Wang<sup>1</sup>; Qing Zhou<sup>1,5</sup>; Lin Xu<sup>1</sup>; Jian Wang<sup>3</sup>; Rong Yin<sup>1</sup>.

## **Institution:**

1 Department of Thoracic Surgery, Nanjing Medical University Affiliated Cancer Hospital, Jiangsu Key Laboratory of Molecular and Translational Cancer Research, Cancer Institute of Jiangsu Province, Baiziting 42, Nanjing, P.R. China, 210009

2 The First Clinical College of Nanjing Medical University, Nanjing, 210000, China

3 Department of Thoracic Surgery, The Affiliated Jiangning Hospital of Nanjing Medical University, No. 168 Dongshan Street Gushan Road, Nanjing 211100, China

4 The Fourth Clinical College of Nanjing Medical University, Nanjing 210000, China

5 Department of Oncology, Nanjing Medical University Affiliated Cancer Hospital, Baiziting 42, Nanjing, P.R. China, 210009

#the three authors contributed equally to this work

**Correspondence:** Lin Xu

Address: Baiziting 42, Nanjing, China, 210009

TEL: 86-25-83284700

FAX: 86-25-83641062

E-mail: xulin83cn@gmail.com

This work can also correspondence to Rong Yin; TEL:86-25-83283408, E-mail: yinhero001@126.com;

Jian Wang; TEL:86-25-52281471, E-mail: wangjianjnny@126.com.

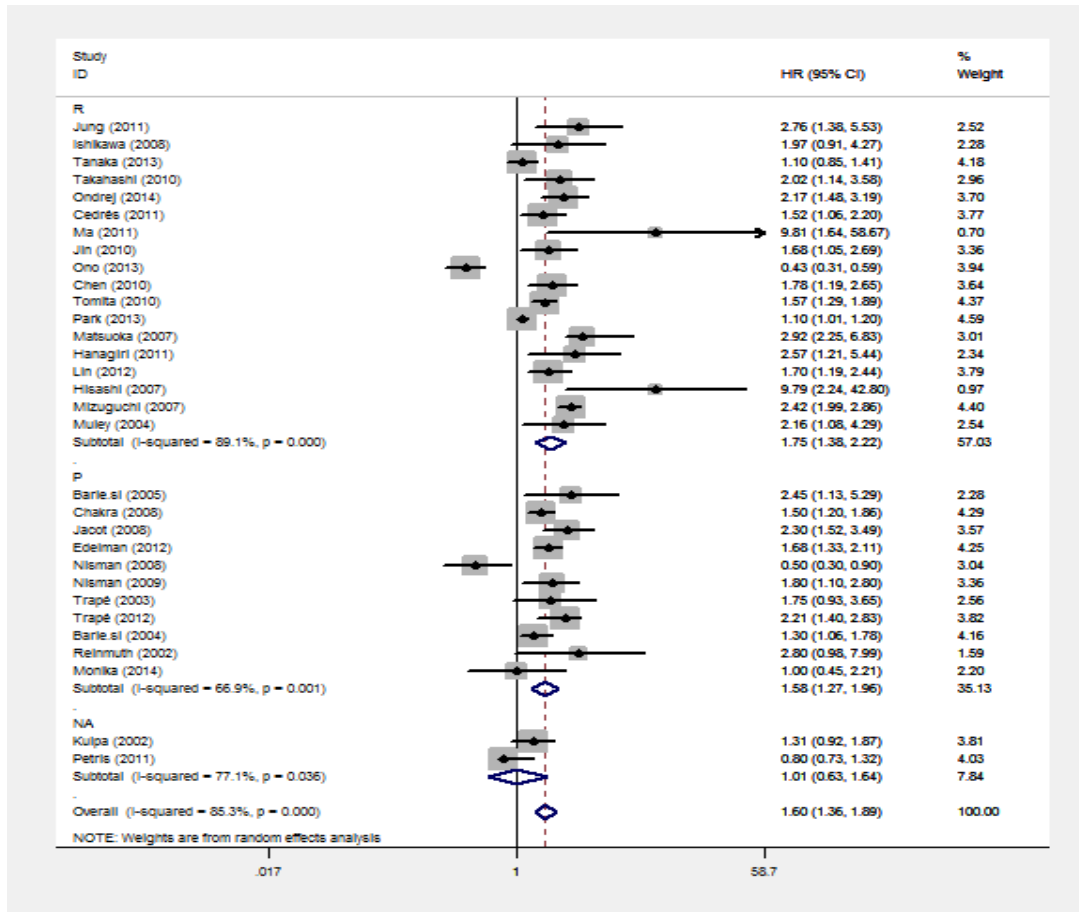

**Supplementary Fig. S1** The association between serum CYFRA 21-1 and overall survival of NSCLC stratified by study design

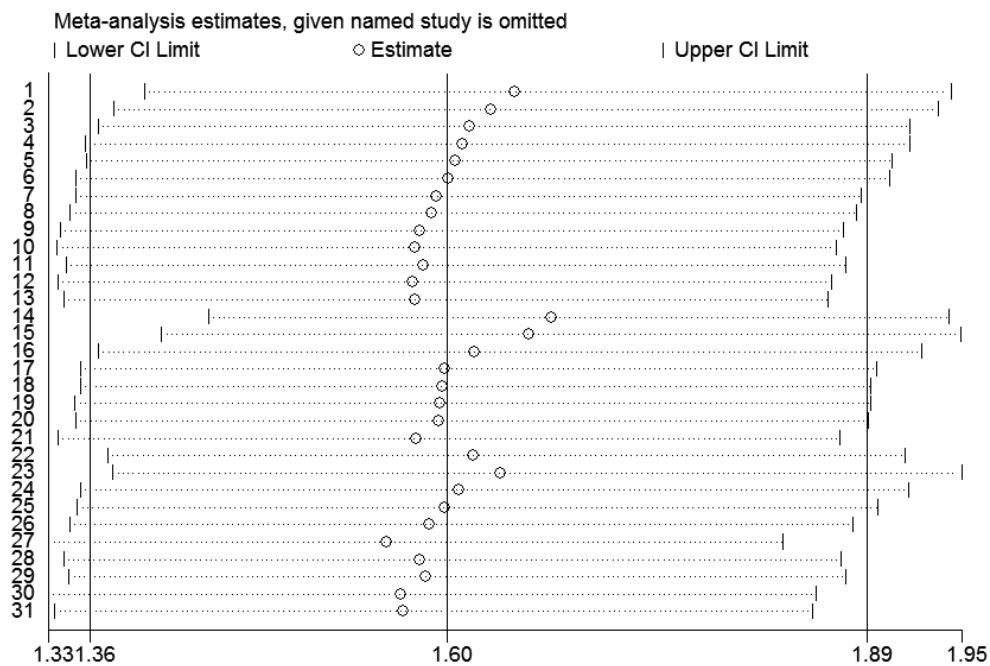

**Supplementary Fig. S2** Sensitivity analysis of association between serum CYFRA 21-1 and overall survival of NSCLC

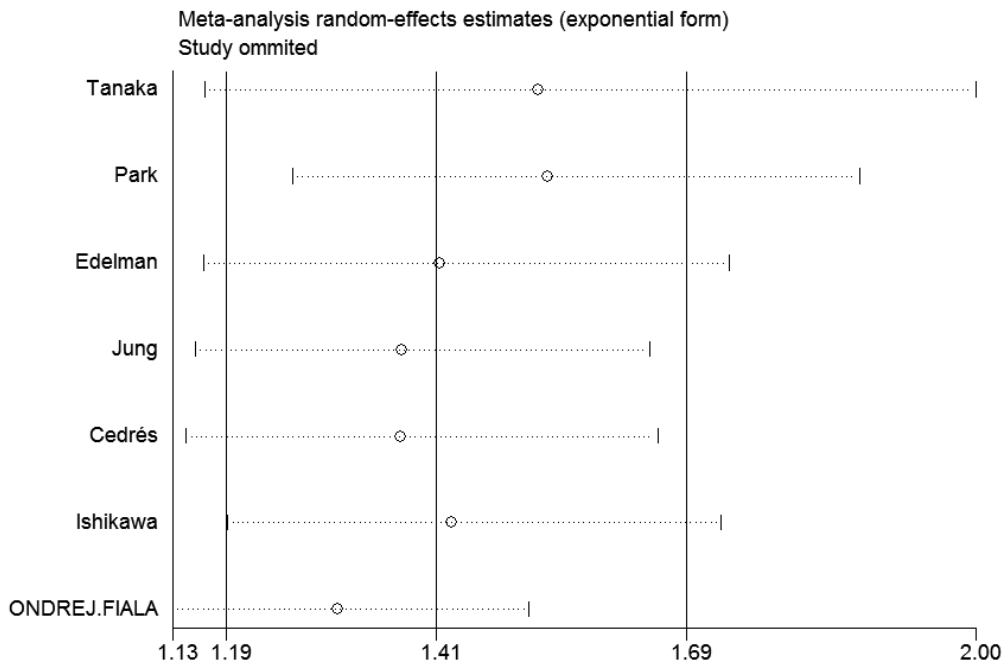

**Supplementary Fig. S3** Sensitivity analysis of association between serum CYFRA 21-1 and progression free survival of NSCLC
